# Supplementary material for: β-Adrenergic blockade combined with subcutaneous B-type natriuretic peptide: a promising approach to reduce ventricular arrhythmia in heart failure?
Source: HighWire-hosted journal article supplement (doi:10.1136/heartjnl-2013-305167), 2014-03-25
Supplement: heartjnl-2013-305167supp.pdf [file heartjnl-2013-305167supp.pdf]

**SUPPLEMENTAL MATERIAL**

**Beta-adrenergic blockade combined with subcutaneous B-type natriuretic peptide:  
A promising approach to reduce ventricular arrhythmia in heart failure?**

Jérôme Thireau<sup>||</sup>, Sarah Karam<sup>\*†</sup>, Stéphanie Roberge<sup>\*†</sup>, Julien Roussel<sup>\*</sup>, Franck Aimond<sup>\*</sup>, Cécile Cassan<sup>\*</sup>, Arnaud Gac<sup>‡</sup>, Dominique Babuty<sup>§</sup>, Jean-Yves Le Guennec<sup>\*</sup>, Alain Lacampagne<sup>\*</sup>, Jérémy Fauconnier<sup>\*</sup>, Sylvain Richard<sup>\*</sup>

<sup>\*</sup>Inserm U1046, *Physiologie & Médecine Expérimentale, Cœur et Muscles*, Université Montpellier-1 & Université Montpellier-2, Montpellier, France.

<sup>‡</sup>ADInstruments Limited, Oxford OX4 6HD, UK

<sup>§</sup>Hôpital Trousseau, Tours, France.

<sup>†</sup>*Equal contribution.*

**|| Corresponding author:** Dr. Jérôme Thireau

Inserm U1046, Physiologie & Médecine Expérimentale, Cœur et Muscles  
CHU Arnaud de Villeneuve, 371 Rue du doyen G. Giraud, 34295 Montpellier

**Phone:** (33)04.67.41.52.22

**Fax:** (33)04.67.41.52.42

**E-mail:** jerome.thireau@inserm.fr

## Methods

### Animals and BNP

Seven-week-old male C57Bl/6 mice (Janvier, France) were randomly assigned to the following groups: 1) mice in post-myocardial infarction after left coronary artery ligation as previously described (PMI mice); 2) PMI mice treated with BNP (BNP-PMI); 3) PMI mice treated with metoprolol (BB-PMI); 4) PMI mice treated with metoprolol and BNP (BB-BNP-PMI) and 5) sham-operated mice (Shams).[1] For PMI, a left thoracotomy was performed under anesthesia and cardiac monitoring (2% isoflurane/O<sub>2</sub>, Aerrane®, Baxter, France). The artery was ligated 1-2 mm beyond the emergence from the top of the left atrium, using an 8-0 suture. A subcutaneous injection of 0.01 ml buprenorphine solution (0.3 mg.ml<sup>-1</sup>) for post-operative analgesia was administered. Shams were subjected to the same surgical procedure but without coronary artery ligation. Echocardiography was systematically realized before the inclusion of animal to ensure that ligation was correctly performed. Only animals surviving at day-5 post surgery and with comparable echocardiography parameters at this time were included in the study to limit bias due to differences in size infract. No animal died or had been sacrificed after inclusion in the study, and before the end of experiments due to achievement of endpoints (according to our ethics committee). Metoprolol (Sigma-Aldrich, 100mg.kg<sup>-1</sup>.day<sup>-1</sup>) was administered in the drinking water.[2] The active form of mouse BNP (Ref 14-5-30A, American Peptide, Sunnyvale, USA) was administered using a micro-osmotic pump (Alzet 1002, France, 0.03 µg.kg<sup>-1</sup>.min<sup>-1</sup> for 14 days).[2] Circulating BNP levels were assessed on Day-28 (Phoenix Pharmaceuticals, Belmont, USA). BNP levels in Shams were inferior to 0.34 ng/ml. BNP levels increased to 5.1±0.9 ng/ml in PMI, 4.7±0.8 ng/ml in BB-PMI, 11.2±0.7 ng/ml in BNP-PMI, and 11.9±1.0 ng/ml in BB-BNP-PMI mice (n=8 per group). Following *in vivo* investigations, the heart was explanted after cervical dislocation for single-cell experiments. The time sequence of the protocol is available in the on-line supplement (**Figure 1**). All procedures conformed to European Parliament Directive 2010/63/EU and the 22 September 2010 Council on the protection of animals, and were approved by the institutional animal research committee (Departmental Directorate of protecting populations and animal health (ethics for animal welfare and environmental protection, N° A 34- 485) and by our Ethics committee for animal experiments, Languedoc Roussillon, N° CE-LR-0714).

### **Choice of the BNP dose.**

In clinics, recommendations include an optional intravenous bolus of nesiritide for rapid haemodynamic changes in urgency at a dose of  $2 \mu\text{g.kg}^{-1}$  (administered at the discretion of the investigator) and a continuous infusion of  $0.01$  to  $0.03 \mu\text{g.kg}^{-1}.\text{min}^{-1}$  for 24 hours or more for up to 7 days. Dosage is also adjusted during chronic infusion to limit severe hypotension. In our study, animals were treated with continuous infusion of BNP for 14 days by means of micro-osmotic pumps ( $0.03 \mu\text{g.kg}^{-1}.\text{min}^{-1}$ ). To our knowledge, no dose-effect relationship in mice was published on cardiac function from cellular to *in vivo* experiments in chronic conditions. In addition, no time-course of BNP release into circulation after coronary artery ligation was available. Thus we chose the dose and duration of exposure based on BNP dosages and on its associated effects published in our previous paper.[1] At this dose, BNP presented hemodynamic effects (decreased mean arterial pressure) and beneficial anti-fibrotic effect that are expected to be beneficial, but paradoxically induced cardiac remodeling due to sympathetic activation as recently confirmed [1-5]. As consequences, chronic BNP promoted  $\text{Ca}^{2+}$  signaling defects and pro-arrhythmogenic effects even in healthy mice.[1] In addition, as in clinics, the dose was chosen to rise circulating BNP level in heart failure individuals who have already high circulating BNP concentration. We already described that supplementation with  $0.03 \mu\text{g.kg}^{-1}.\text{min}^{-1}$  allows a clear rise in BNP-Sham mice.[1] Thus, we kept  $0.03 \mu\text{g.kg}^{-1}.\text{min}^{-1}$  to promote a clear rise of circulating BNP level following pump implantation in PMI mice. Thus, BNP level in PMI mice rised slowly during the 2 weeks after the ligation (day-4 after PMI;  $0.96 \pm 0.64 \text{ ng/ml}$   $n=6$ , and day-8;  $2.26 \pm 1.79 \text{ ng/ml}$ ,  $n=5$ ) and reached steady-state at 3 and 4 weeks after ligation ( $5.40 \pm 1.20 \text{ ng/ml}$  and  $5.10 \pm 0.90 \text{ ng/ml}$ ,  $n=7$ ; respectively). At the end of supplementation, circulating BNP levels increased to  $11.2 \pm 0.7 \text{ ng/ml}$  in BNP-PMI, and  $11.9 \pm 1.0 \text{ ng/ml}$  in BB-BNP-PMI mice ( $n=8$  per group) confirming the proper release of product. To note, BNP levels in Shams were inferior to  $0.34 \text{ ng/ml}$ .

### ***In vivo* analysis**

Cardiac function was assessed by echocardiography (Vivid7Pro, GE Medical Systems, USA). LV mass, LV shortening fraction, end-diastolic and end-systolic LV dimension were measured.[3] Electrocardiograms were recorded by telemetry (DSI, St. Paul, MN).[3] We have taken care to respect

the Lambeth conventions from the housing of animal to the determination of arrhythmic events.[4] ECG signals were digitally filtered between 0.1 and 1,000 Hz. Heart rate variability, PR, QRS, corrected QT (QTc) intervals and spontaneous arrhythmias were analyzed using 12h nocturnal ECGs (ECG-auto, EMKA Technologies, France).[5] The QT interval was defined as the time between the first deviation from an isoelectric PR interval until the return of the ventricular repolarization to the isoelectric TP baseline from lead II ECGs. The QT correction was performed with the adapted Bazett's formula of Mitchell.[6] To assess the variability of the ventricular repolarization (an index of proarrhythmic outcome), we evaluated the QT interval variability.[7] The mean orthogonal distance from diagonal to the points of the Poincaré plots was calculated and referred to as short term variability of QT ( $QT_{STV}$ ) by using the formula  $QT_{STV} = \sum |QT_n - QT_{n-1}| / (50 \times \sqrt{2})$ . [8, 9] Only sinus beats were included in the analysis (60 analyses of 1 min every 2 minutes/ 2hours  $\approx$  40,000 analyzed QRST complexes). To test arrhythmogenic susceptibility, the  $\beta$ -adrenergic catecholamine agonist isoproterenol ( $2.5 \text{ mg.kg}^{-1}$  i.p) was injected just before the end and 4 weeks after the treatment (8 weeks after the ligation). The triggering of sustained ventricular tachycardia (SVT), as defined by the Lambeth conventions (more than 20 successive irregular beats), was monitored. At the same time-points that test of arrhythmogenic susceptibility, blood pressure (systolic, diastolic, mean arterial pressure, in mmHg) was measured non-invasively with a tail cuff and pulse transducer (ML125/M NIBP System, ADInstruments, United-Kingdom). Measurements were performed in triplicate in conscious restrained mice after an acclimatization period of 3 weeks.

### **Autopsy and heart excision**

After euthanasia, autopsies were performed to verify for the presence of pleural effusion. The heart and lungs were excised and weighed, and the heart weight index determined (heart weight/body weight). Lung congestion was established when the lung weight exceeded the mean lung weight of WT animals  $\pm 2$  SD.[5] Interstitial fibrosis was measured in 10  $\mu\text{m}$  thick transverse sections of mouse hearts in the peri-infarcted area (Hematoxylin-eosin and Sirius red staining). Results show the area of Sirius red-stained tissue (percentage of total area of myocardial tissue).

## RNA extraction and RT-qPCR

Total RNA was extracted from approximately 15-25 mg of left ventricular cardiac tissue, using TRIzol reagent according to the manufacturer's protocol (Euromedex), then treated with DNase I (Invitrogen) at 37°C for 30 min. cDNA was synthesized using superscript II reverse transcriptase (Invitrogen) at 42°C for 50 min. RT-QPCR was performed in duplicates using a LightCycler rapid thermal cycler (Roche, France). Twenty  $\mu$ l reaction mixture contained 10  $\mu$ l of Absolute QPCR SYBR Green Capillary Mix (Thermo Fisher Scientific, containing thermo start DNA polymerase, reaction buffer, deoxynucleoside triphosphate mix, 3 mM MgCl<sub>2</sub> and SYBR Green I dye), was added with 0.5  $\mu$ M of appropriate primer mix, and 5  $\mu$ l of cDNA. Forward and reverse primers for each gene were chosen on the basis of previously published sequences (myocardin-related transcription factor A (MRTF-A) - forward/reverse; CGTGCTCAATGCCTTC/GGCGGATCATTCACTCT; serum response factor (SRF) - forward/reverse TTGTCGCCAGCCTGGTCTCCA/ATCTGCTGAAATCTCTCCACTCTG, NCX1: forward primer aggcggctctcttttac / reverse primer caacttccaaaccagag, SERCA2: forward primer agttcatccgctacctcatctca / reverse primer caccagattgaccagagtaactg, S100A1: forward primer ccctctgtcgagaatctgttc / tcagcttatattgtccccttc). The amplification program included the initial denaturation step at 95°C for 15 min, and 40 cycles of denaturation at 95°C for 1 s, annealing at 65°C for 10 s, and extension at 72°C for 20 s. Melting curves were used to determine the specificity of PCR products. Data were normalized to GAPDH (8 mice per group).

## Ca<sup>2+</sup> handling

Ca<sup>2+</sup> experiments were performed on freshly isolated LV myocytes. The mouse was euthanized by cervical dislocation, after which the heart rapidly was excised and retrogradely perfused (Langendorff perfusion) at 37°C for 6–8 min with a modified tyrode solution [113 mM NaCl, 4.7 mM, KCL, 0.6 mM KH<sub>2</sub>PO<sub>4</sub>, 0.6 mM Na<sub>2</sub>HPO<sub>4</sub>, 1.2 mM MgSO<sub>4</sub>, 12 mM NaHCO<sub>3</sub>, 10 mM KHCO<sub>3</sub>, 10 mM Hepes, 30 mM Taurine (pH 7.4)] containing 0.1g.ml<sup>-1</sup> Liberase Dispase High Research Grade (Roche, France) perfusion. Cells were kept in 1.8 mM Ca<sup>2+</sup> (20-22°C) before starting experiments. There was

no difference between age groups. To monitor intracellular  $\text{Ca}^{2+}$  concentration, cardiomyocytes were loaded with the fluorescent ratiometric  $\text{Ca}^{2+}$  indicator Indo-1AM (10  $\mu\text{M}$ , *Invitrogen*, France). Cells were field-stimulated at 1.0 Hz with 1-ms current pulses delivered via two platinum electrodes, one on each side of the perfusion chamber (IonOptix system, Hilton, USA) (20V, 1 ms) and simultaneously illuminated at 305 nm using a xenon arc bulb light.[3] Indo-1AM fluorescence emitted at 405 nm and 480nm was recorded simultaneously and  $\text{Ca}^{2+}$  fluorescence was measured during a 30s pacing period (1.0Hz), followed by a 30s rest period. Diastolic  $\text{Ca}^{2+}$  levels and the number of cells developing spontaneous irregular  $\text{Ca}^{2+}$  waves were quantified during the rest period.[3]  $\text{Ca}^{2+}$  concentration was estimated through the fluorescence ratio (F405/F480).  $\text{Ca}^{2+}$  transient decay time (t) was measured by fitting the descending phase of the fluorescence trace to a single exponential function.  $\text{Ca}^{2+}$  sparks were recorded in quiescent cells incubated with Fluo-4AM (5 $\mu\text{M}$ , 1.5ms/line; LSM510 Zeiss confocal microscope, 63X water-immersion objective, NA: 1.2) at 25°C.[3] Fluorescence was excited at 488 nm and emission was collected through a 505-nm (F505) long-pass filter. Frequency, averaged amplitude, the full width at half-maximum (FWHM) and full duration at half maximum (FDHM) were measured by following variations of fluorescence at 505nm ( $\Delta F$ ) divided by initial F505 (F0). Cell volume was estimated using Z-stack (x-y projection, front view) image acquisition.[2] Data were analyzed using *ImageJ* and *SparkMaster*.

### **$\text{Ca}^{2+}$ handling proteins**

LV were homogenized directly into lysis buffer (20 mM HEPES pH7.4, 40 mM KCl, 1 mM DTT, 0.3% CHAPS, 1 mM PMSF, 1 $\mu\text{g}/\text{mL}$  leupeptin, 1  $\mu\text{g}/\text{mL}$  pepstatin, 1 mM EDTA). Lysates were centrifugated at 6,000 x g for 5 min. Proteins were quantified with DC Protein Assay (Biorad). Fifty micrograms of total proteins were loaded on SDS-PAGE. Proteins were transferred on nitrocellulose membrane (0.2  $\mu\text{m}$ ) (GE Healthcare). The membranes were blocked (Blocking buffer from ThermoScientific) and then incubated with primary antibody at 4°C overnight: the sarcoplasmic reticulum  $\text{Ca}^{2+}$ -ATPase SERCA2a (1:5,000) (A010-20, Badrilla), the  $\text{Na}^{+}$ - $\text{Ca}^{2+}$  exchanger NCX1 (1:1,000) (R3F1, Swant), the ryanodine receptor RyR2 (1:1,000) (Covalab, France), its phosphorylated form, PhosphoSer2808-RyR-2 (1:1,000) (A010-30, Badrilla, UK), phospholamban (1:20,000) (A010-

14, Badrilla) and its phosphorylated form PhosphoSer16-PLB (1:5,000) (A010-12, Badrilla) and the Ca<sup>2+</sup>-binding protein S100A1 (1:2,500) (SP5355P, Acris antibodies GmbH, Germany). Protein levels were expressed relative to GAPDH (1:60,000) (ab8245, Abcam, France). The membranes were then incubated with secondary antibody: anti-rabbit 800 nm (1:30,000) (for SERCA2a, PhosphoPLB, RyR2, PhosphoRyR2 and S100A1) or anti-mouse 800 nm (1:30,000) (for NCX1, PLB and GAPDH) for 1h in the dark. After the final washes, the membranes were scanned by using Odyssey Infrared Imager (LI-COR Biosciences).

### **Cellular electrophysiology**

Whole-cell voltage- and current-clamp experiments were performed at room temperature on rod-shaped Ca<sup>2+</sup>-tolerant myocytes using whole-cell patch-clamp techniques (22-24°C), with an Axopatch 1D amplifier interfaced through a microcomputer equipped with a Digidata 1200 digitizer and pClamp 8 software (Axon Instruments). For voltage- and current-clamp experiments, the recording pipettes contained (in mmol/L): KCl 120; EGTA 11; HEPES 10; MgCl<sub>2</sub> 6.8; CaCl<sub>2</sub> 4.7 ATPNa<sub>2</sub> 4 and GTPNa<sub>2</sub> 0.4 (pH 7.2). The bath solution contained (in mmol/L): NaCl 130; KCl 4; MgCl<sub>2</sub> 1.8; CaCl<sub>2</sub> 1.8; HEPES 10; glucose 11; CoCl<sub>2</sub> 5 and tetrodotoxin (TTX) 0.02 (pH 7.4). Whole-cell membrane capacitance and series resistance in each cell were measured and compensated electronically (>80%) prior to recording membrane currents. Whole-cell voltage-gated outward K<sup>+</sup> currents were evoked by 4.5 s voltage steps to potentials between -40 and +50 mV from a holding potential (HP) of -80 mV. The inward rectifying current, referred to as I<sub>K1</sub>, was recorded by applying 450 ms voltage steps to potentials between -120 and -40 mV from a HP of -80 mV. For I<sub>Ca,L</sub> study, external recording solution contained 136 mM tetraethylammonium (TEA)-Cl, 2 mM CaCl<sub>2</sub>, 1.8 mM MgCl<sub>2</sub>, 10 mM Hepes, 5 mM 4-aminopyridine, and 10 mM glucose, pH 7.4, with TEA-OH. Pipette solution contained 125 mM CsCl, 20 mM TEA-Cl, 10 mM EGTA, 10 mM Hepes, 5 mM phosphocreatine, 5 mM Mg<sub>2</sub>-ATP, and 0.3 GTP, pH 7.2, with CsOH. Myocytes were held at -80 mV, and 10-mV depolarizing steps from -50 to 50 mV for 300 ms were applied. For current-clamp experiments, TTX and CoCl<sub>2</sub> were omitted from the bath solution, and action potentials (APs) were recorded in response to brief (1-

2 ms) depolarizing current injections delivered at 1 Hz. Voltage-clamp data were analyzed using Clampfit (Axon Instruments, UK). Integration of the capacitive transients recorded during brief  $\pm 10$  mV voltage steps from the HP provided whole-cell membrane capacitances ( $C_m$ ). Leak currents ( $< 10$  pA) were not corrected. Peak currents at each test potential were defined as the maximal outward  $K^+$  current. The amplitudes and time constants of inactivation ( $\tau_{inact}$ ) of  $I_{to,f}$ ,  $I_{K,slow}$  and  $I_{ss}$  were determined from double exponential fits to the decay phases of the outward  $K^+$  currents, as described [1]. Current amplitudes were normalized to whole-cell membrane capacitance, and current densities (pA/pF) reported. The resting membrane potential, and the amplitude and duration of AP at 20% (APD<sub>20</sub>), 50% (APD<sub>50</sub>) and 90% (APD<sub>90</sub>) repolarization were also measured.”

### **Statistical analysis**

All data are reported as means $\pm$ SD (mean $\pm$ SE for patch-clamp experiments). Statistical analyses were performed using GraphPad Prism and Origin Softwares. One-way ANOVA for multiple comparisons was used, followed by a parametric t-test with Bonferroni's correction. Percentage data were analyzed by a *chi-square* test. A p-value of 0.05 or less indicated a statistically significant difference.

### **Calcium leak in heart failure**

*To date, what known about  $Ca^{2+}$  cycling in healthy and heart failure conditions?*

$Ca^{2+}$ -induced  $Ca^{2+}$  release (CICR) is the basis of cardiac excitation-contraction coupling. During systole, the L-type  $Ca^{2+}$  channels (LTCC) activate type-2 ryanodine receptors (RYR2), which release  $Ca^{2+}$  from sarcoplasmic reticulum (SR).[2] After CICR, cytosolic  $Ca^{2+}$  is mainly re-uptaken by the SERCA2a into SR, thereby leading to relaxation during diastole. During diastole, simultaneous spontaneous activations of RyR2 generate local increase in cytosolic  $Ca^{2+}$ , events named as  $Ca^{2+}$  sparks.[3] These sparks are mostly responsible for the diastolic SR  $Ca^{2+}$  leak in ventricular cardiomyocytes.[4-6]



In healthy conditions, the RyR2 can spontaneously open and induce SR  $\text{Ca}^{2+}$  leak during diastole, a phenomenon that participates to the regulation of SR  $\text{Ca}^{2+}$  load.[6]

During heart failure, ventricular cardiomyocytes exhibit a down regulation of SERCA2a activity leading to a slower decay of cytosolic  $\text{Ca}^{2+}$  transient and consecutive impairment of  $\text{Ca}^{2+}$  reuptake into the SR.[7] As a result, cytosolic  $\text{Ca}^{2+}$  level in end-diastole increases and a prolongation of the  $\text{Ca}^{2+}$  transient occurs in heart failure.[8, 9] In parallel, failing cardiomyocytes present increased expression and activity of  $\text{Na}^+/\text{Ca}^{2+}$  exchanger (NCX).[10, 11] Thus, SR  $\text{Ca}^{2+}$  efflux in diastole can influence cardiac function by depleting the SR  $\text{Ca}^{2+}$  content. Moreover, increased  $\text{Ca}^{2+}$  leak ( $\text{Ca}^{2+}$  sparks) is observed in several models of heart failure, which contributes to increase cytosolic  $\text{Ca}^{2+}$  level in diastole.[12, 13] This  $\text{Ca}^{2+}$  leak is implicated in the reduction of contractile force by reducing the SR  $\text{Ca}^{2+}$  load and can also be pro-arrhythmogenic through the extrusion of  $\text{Ca}^{2+}$  by the electrogenic NCX.[14, 15]. Associated with the electrogenic activity of NCX, the summation of  $\text{Ca}^{2+}$  released from several local sparks could trigger CICR and generate arrhythmogenic spontaneous  $\text{Ca}^{2+}$  waves, independently of  $\text{Ca}^{2+}$  entry via the LTCC.[4, 16]

Shannon et al addressed how SR  $\text{Ca}^{2+}$  load could modify SR  $\text{Ca}^{2+}$  leak and conversely.[6] They determined that : (1) SR  $\text{Ca}^{2+}$  load depends both on  $\text{Ca}^{2+}$  leak from RyR2 and  $\text{Ca}^{2+}$  gradient through the SR  $\text{Ca}^{2+}$  ATPase, and (2)  $\text{Ca}^{2+}$  leak, even in healthy animals, has measurable effect on SR  $\text{Ca}^{2+}$  load. In addition, they showed that SR  $\text{Ca}^{2+}$  load regulates the  $\text{Ca}^{2+}$  leak (*i.e.* a load dependence of the leak). They observed that SR  $\text{Ca}^{2+}$  leak increases with SR  $\text{Ca}^{2+}$  load in intact *healthy cardiomyocytes*, *i.e.* without any modification (expression or post-traductional modifications) of key  $\text{Ca}^{2+}$  handling proteins (SERCA2a, NCX, and S100A1).[6] To summarize, in healthy conditions, at higher cytosolic  $\text{Ca}^{2+}$  in diastole, the higher  $\text{Ca}^{2+}$  leak prevents a deleterious SR  $\text{Ca}^{2+}$  overload. As SR  $\text{Ca}^{2+}$  load increases, the  $\text{Ca}^{2+}$  leak increases. As  $\text{Ca}^{2+}$  leak increases, the SR  $\text{Ca}^{2+}$  load decreases.[6] In addition, these authors argued that anything that could shift the relationship between SR  $\text{Ca}^{2+}$  load or RyR opening (as modification of  $\text{Ca}^{2+}$  handling protein expression or activity due do modification of expressions or post-traductional modifications) could change the SR  $\text{Ca}^{2+}$  load for a given cytoplasmic diastolic  $\text{Ca}^{2+}$  level.[6] Reciprocally, SR  $\text{Ca}^{2+}$  leak increases for a given SR  $\text{Ca}^{2+}$  load.[17] Thus, in

heart failure conditions, with major modifications of activity of  $\text{Ca}^{2+}$  handling protein, Shannon et al. suggested that if SR  $\text{Ca}^{2+}$  leak is increased in heart failure, it may reduce SR  $\text{Ca}^{2+}$  load and SR  $\text{Ca}^{2+}$  release in diastole as they previously observed.[18, 19] This concept was also developed by Marx and collaborators (see [20] for review) i.e. ; a high persistent diastolic SR  $\text{Ca}^{2+}$  leak due to increased  $\text{Ca}^{2+}$  sparks frequency is responsible for excitation-contraction coupling defect in heart failure. Associated with increased NCX activity and reduced  $\text{Ca}^{2+}$  reuptake into SR by SERCA2a that decreased SR  $\text{Ca}^{2+}$  load, this high  $\text{Ca}^{2+}$  sparks frequency induces spontaneous CICR and is responsible for spontaneous  $\text{Ca}^{2+}$  waves and arrhythmia. In brief, the SR  $\text{Ca}^{2+}$  leak conversely influences the SR  $\text{Ca}^{2+}$  load in diastole and reduces the SR  $\text{Ca}^{2+}$  release during systole.[6, 18, 19]

This theory is largely supported by literature. Indeed, the level of cytosolic  $\text{Ca}^{2+}$  also regulates the SR  $\text{Ca}^{2+}$  leak directly by binding to the high-affinity activation site of the cytosolic side of the RyR.[21] These results were elegantly confirmed by Bovo et collaborators who directly measured SR  $\text{Ca}^{2+}$  leak as the rate of SR  $\text{Ca}^{2+}$  declines after SERCA inhibition in both healthy (that could exaggeratedly mimic the decrease of SERCA2a activity during heart failure) and in failing cardiomyocytes.[12, 22] As elevated SR  $\text{Ca}^{2+}$  declines and low cytosolic  $\text{Ca}^{2+}$  level in diastole rises,  $\text{Ca}^{2+}$  leak, as  $\text{Ca}^{2+}$  sparks frequency, increases. This is sufficient to trigger spontaneous pro-arrhythmogenic  $\text{Ca}^{2+}$  waves.[22]

$\text{Ca}^{2+}$  Sparks "morphology" also brings valuable information about spontaneous  $\text{Ca}^{2+}$  release and physiological regulation of this process.[3] Thus, the amplitude of  $\text{Ca}^{2+}$  sparks proportionally decreases with the reduction of SR  $\text{Ca}^{2+}$  load and the augmentation of cytosolic  $\text{Ca}^{2+}$  level in diastole.[22] In the same way, the spatial width of a spark, usually represented by the full width at half-maximum (FWHM) and the full duration at half maximum (FDHM) revealing parameters of microscopic  $\text{Ca}^{2+}$  diffusion and reaction, could reflect modification of RyR activity independent to SR  $\text{Ca}^{2+}$  load.[3, 23]

*Comparing  $\text{Ca}^{2+}$  leak theory and previous works with our results.*

Our experimental results are consistent with this theory and expected results in PMI mice. Indeed, in PMI, we observed that  $\text{Ca}^{2+}$  uptake by the SR, mainly regulated by the activity of SERCA2a and its

regulatory proteins PLB [24], was impaired as revealed by the reduced  $\text{Ca}^{2+}$  transient decay rate that leads to subsequent increase in diastolic cytosolic  $\text{Ca}^{2+}$ . The increase in  $\text{Ca}^{2+}$  level in diastole promoted a persistent SR  $\text{Ca}^{2+}$  leak (higher  $\text{Ca}^{2+}$  sparks frequency) and conversely influenced the SR  $\text{Ca}^{2+}$  load which was proportionally decreased. All our results conformed with the results of Bers, Bovo and co-workers [12, 22] In addition, the higher sparks frequency, expected to promote spontaneous  $\text{Ca}^{2+}$  waves, increased the number of cardiomyocytes triggering abnormal spontaneous  $\text{Ca}^{2+}$  waves. The decrease in SR  $\text{Ca}^{2+}$  content and lower  $\text{Ca}^{2+}$  transient amplitude accounted for the decrease of cellular contraction. In addition, as expected, the amplitude of  $\text{Ca}^{2+}$  sparks was decreased in cardiomyocytes isolated from PMI mice according to decreased SR  $\text{Ca}^{2+}$  content (See new figure 4).[22] The full width at half-maximum (FWHM) and the full duration at half maximum (FDHM) were also increased in PMI animal. Other authors also found increase in FWHM and FDHM when cytosolic  $\text{Ca}^{2+}$  was increased (See figure 4).[23, 25-28]

Thus, in our model, an increase in  $\text{Ca}^{2+}$  spark frequency could result from an increase in cytosolic  $\text{Ca}^{2+}$  level due to blunted SERCA2a activity, associated with a modulation of the intrinsic properties of the RyR2 complex. This decreased SR  $\text{Ca}^{2+}$  load as we observed after caffeine application in PMI mice. In BNP-PMI mice, the further reduction of S100A1 when compared to PMI could account for the worsening of  $\text{Ca}^{2+}$  signaling and further increase in  $\text{Ca}^{2+}$  leak and reduction of SR  $\text{Ca}^{2+}$  content. Indeed, the decrease of S100A1 reported in HF[29] promotes SR  $\text{Ca}^{2+}$  leak via RyR2 increased open probability,[30] and decreases  $\text{Ca}^{2+}$  re-uptake via the SERCA2a.[29] As consequences, RyR2 characteristics (frequency, amplitude, FWHM, and FDHM) were further altered [30](Figure 4) without modification of Ser 16 phosphorylation by PKA. Of note, decreased S100A1 also induces prolonged ventricular repolarization in response to sympathetic activation as observed by others in HF [31] and also in our experiments.

Thus, our results are in line with the more recent theory to treat heart failure by targeting –first, the down-regulation of SERCA2a activity, secondly the aberrant RyR2 opening in diastole,[32] and –third, the decreased expression of the  $\text{Ca}^{2+}$  handling protein S100A1; an endogenous regulator of both SERCA2a and RyR2 function.[33] To note, S100A1 was more efficient when added to  $\beta$ -blocker.[34]

## Mechanism of pro-arrhythmic effect of BNP

We used the patch-clamp technique to measure the action potential with a current-clamp approach, and the depolarizing  $I_{Ca,L}$  and repolarizing  $K^+$  current  $I_K$  ( $I_{to}$ ,  $I_{Kslow}$  and  $I_{ss,kl}$ ) in voltage-clamp conditions in BNP-PMI, PMI and Sham mice. We observed that PMI mice present an increase in AP duration when compared to Sham animals, as already described.[35], with a lengthening of APD50 and APD90 (Figure S5, Table S1). The LV cardiomyocytes isolated from PMI mice also exhibited a significant reduction of  $I_{Ca,L}$  current density (when compared with shams) as already described.[36, 37] The steady-state inactivation was also right-shifted to more positive potentials and  $I_{Ca,L}$  decay kinetics were dramatically slowed in line with high cytosolic  $Ca^{2+}$  in diastole. All results conformed to literature.[38] The inwardly rectifying  $I_{K1}$  current was not significantly altered in our model. Data in literature diverged on change in the inward rectifying current in disease hearts. In rat failing cardiomyocytes,  $I_{K1}$  was found to be reduced,[39] whereas in spontaneous hypertensive rats, in failing rabbit and in aorta-constricted guinea-pig, it was unchanged.[40-42] In myocytes isolated from human or dog failing left ventricle,  $I_{K1}$  was slightly decreased, however, difference was found at potential that do not contribute to AP repolarisation.[43, 44] In contrast to  $I_{K1}$ , we showed a diminution of the outwardly rectifying potassium currents ( $I_{to}$ ,  $I_{Kslow}$ ) in PMI mice compared with sham animal as already described.[45] We obtained results comparable with that of Tsuji *et al.*[46] In addition, early afterdepolarizations (EAD) were observed in 20% of LV cardiomyocytes of PMI mice during repetitive stimulation, while cardiomyocytes isolated from sham mice did not develop these EADs.

BNP had no further effect on AP duration,  $K^+$  and  $Ca^{2+}$  current density and inactivation of PMI animal (BNP-PMI group). However, BNP treatment strongly increased the occurrence of EAD in LV cell from BNP-PMI mice (54% of cells).

While membrane potential of PMI cells presented a slight depolarization when compared to sham cell, BNP induced a net depolarization of the resting membrane potential in BNP-PMI mice, a phenomenon already described in non cardiac cell.[47] In addition, at APD50 and APD90, the membrane potential

was more positive in BNP-PMI when compared to PMI animal. Interestingly, Nifedipine blocked all EADs in both PMI and BNP-PMI animal, suggesting the implication of  $\text{Ca}^{2+}$ -dependent mechanism.

Both early and delayed afterdepolarizations have been incriminated in the generation of cardiac arrhythmia in failing patients. In fact, the progression and severity of left ventricular dysfunction may generate two distinct mechanisms of ventricular arrhythmia.[48, 49] The cellular mechanism relies on oscillations of cellular membrane potential referred as early (EAD) or delayed (DAD) afterdepolarizations. In healthy conditions, the large repolarizing  $I_{to}$  current prevents abnormal repolarization and limits trans-sarcolemma  $\text{Ca}^{2+}$  influx via  $I_{CaT}$  and, thereby, propensity for EADs during the AP plateau.[39, 50] The blunting of  $I_{to}$  in PMI in combination with the frequency-dependent enhancement of  $I_{Ca,L}$  sets two important conditions for the occurrence of EADs. The electrogenic NCX is also incriminated in EAD triggering.[51] Indeed, as pointed by Sipido et al., when NCX is inward during the low AP plateau, the exchange current might prolong the AP duration and set the stage for EAD and, conversely, when AP was lengthened, the inward current generated by NCX during the AP plateau could be enhanced.[11, 52] Thus, high cytosolic  $\text{Ca}^{2+}$  level in HF could maximize this electrogenic effect and favors a membrane potential depolarization. Indeed, since membrane potential varies faster than  $E_{\text{NaCa}}$  during CICR and since the membrane potential  $E_m$  is more negative than  $E_{\text{NaCa}}$  during the low plateau of the AP, the NCX in normal mode generates an inward current.[53] This was firstly theorized by Mullins in 1981 (Mullins LJ. Ion Transport in the Heart. New York: Raven Press, 1981) and nicely reviewed by Janvier and Boyett.[53]

In addition, abnormal spontaneous cytosolic  $\text{Ca}^{2+}$  waves can also influence arrhythmogenesis by promoting, sudden repolarization change and EADS.[54] In this way, several authors showed that aftercontraction and  $\text{Ca}^{2+}$  waves could precede the up-stroke of EAD that supports the role of SR  $\text{Ca}^{2+}$  release and indicates the involvement of a  $\text{Ca}^{2+}$ -dependent current. The smaller  $\text{Ca}^{2+}$  transient in HF may also cause less complete inactivation of  $I_{Ca,L}$  during the early phases of AP and participate to increase the likelihood of reactivation of inward  $I_{Ca,L}$  late during the AP, which favors EAD triggering.[55, 56] This dynamic regulation of  $I_{Ca,L}$  and NCX by SR- $\text{Ca}^{2+}$  release and high cytosolic

$\text{Ca}^{2+}$  plays an important role in triggering EAD which might be amplified during chronic sympathetic overdrive.[57, 58] Thus it has been proposed that EAD is the result of  $\text{Ca}^{2+}$ -induced  $\text{Ca}^{2+}$  release, enhanced electrogenic activity of NCX due to high cytosolic  $\text{Ca}^{2+}$  in diastole and sarcolemmal “windows  $I_{\text{Ca,L}}$  current favored by reduced systolic  $\text{Ca}^{2+}$  transient.[59] As a confirmation of this theory,  $\text{Ca}^{2+}$  current blocker nifedipine prevented all EAD,[51] as we also showed.

In conclusion, our data compared with those of the literature suggest that, in PMI mice, the modification of the electrophysiological properties of ventricular cardiomyocytes including diminished repolarizing  $\text{K}^+$  current and decreased slow  $I_{\text{Ca,L}}$  inactivation accounting for the lengthened AP repolarization, associated with high cytosolic  $\text{Ca}^{2+}$  level due to  $\text{Ca}^{2+}$  leak in diastole from SR, reduced  $\text{Ca}^{2+}$  transient amplitude in systole and increased expression of NCX, could be responsible for the triggering of EADs. These EAD, known to induce dispersion of repolarization which favors reentry,[60] modified the variability of QT (ventricular repolarization) as in our PMI mice which are more prone to trigger spontaneous and catecholamines-induced ventricular arrhythmia than Sham animals.

In BNP-PMI mice, the electrophysiological properties ( $I_{\text{Ca,L}}$ ,  $I_{\text{K}}$ ) were not further modified when compared to that of PMI animal. So, we focused on the  $\text{Ca}^{2+}$  signaling since the only difference was an increase of  $\text{Ca}^{2+}$  leak via RyR2 in diastole which decreased SR- $\text{Ca}^{2+}$  content, an increased cytosolic  $\text{Ca}^{2+}$  in diastole, and a reduced  $\text{Ca}^{2+}$  transient in systole. By comparing with the literature, this could be accounted for by an increase of inward electrogenic NCX activity and more depolarized membrane potential as seen at APD50 and APD90, and therefore for the higher propensity to trigger EAD than in PMI animals. As consequences, BNP-PMI mice exhibited high QT repolarization variability than PMI mice and presented higher occurrence of ventricular extrasystoles, tachycardia and fibrillation leading to cardiac death after  $\beta$ -agonist injection. Approaches that could improve  $\text{Ca}^{2+}$  signaling (reduced  $\text{Ca}^{2+}$  leak in diastole and increase systolic  $\text{Ca}^{2+}$  transient, normalization of  $\text{Ca}^{2+}$ -handling protein expression or activity) could thus diminish the pro-arrhythmogenicity as we showed with the BB-BNP combination.

## References

- 1 Brunet S, Aimond F, Li H, et al. Heterogeneous expression of repolarizing, voltage-gated K<sup>+</sup> currents in adult mouse ventricles. *J Physiol* 2004;**559**:103-20.
- 2 Fabiato A. Calcium-induced release of calcium from the cardiac sarcoplasmic reticulum. *Am J Physiol* 1983;**245**:C1-14.
- 3 Cheng H, Lederer WJ. Calcium sparks. *Physiol Rev* 2008;**88**:1491-545.
- 4 Cheng H, Lederer WJ, Cannell MB. Calcium sparks: elementary events underlying excitation-contraction coupling in heart muscle. *Science* 1993;**262**:740-4.
- 5 Bassani RA, Bers DM. Rate of diastolic Ca release from the sarcoplasmic reticulum of intact rabbit and rat ventricular myocytes. *Biophys J* 1995;**68**:2015-22.
- 6 Shannon TR, Ginsburg KS, Bers DM. Quantitative assessment of the SR Ca<sup>2+</sup> leak-load relationship. *Circ Res* 2002;**91**:594-600.
- 7 Mercadier JJ, Lompre AM, Duc P, et al. Altered sarcoplasmic reticulum Ca<sup>2+</sup>-ATPase gene expression in the human ventricle during end-stage heart failure. *J Clin Invest* 1990;**85**:305-9.
- 8 Morgan JP. Abnormal intracellular modulation of calcium as a major cause of cardiac contractile dysfunction. *N Engl J Med* 1991;**325**:625-32.
- 9 Lindner M, Erdmann E, Beuckelmann DJ. Calcium content of the sarcoplasmic reticulum in isolated ventricular myocytes from patients with terminal heart failure. *J Mol Cell Cardiol* 1998;**30**:743-9.
- 10 Hasenfuss G, Schillinger W, Lehnart SE, et al. Relationship between Na<sup>+</sup>-Ca<sup>2+</sup>-exchanger protein levels and diastolic function of failing human myocardium. *Circulation* 1999;**99**:641-8.
- 11 Sipido KR, Volders PG, Vos MA, et al. Altered Na/Ca exchange activity in cardiac hypertrophy and heart failure: a new target for therapy? *Cardiovasc Res* 2002;**53**:782-805.
- 12 Zima AV, Bovo E, Bers DM, et al. Ca<sup>2+</sup> spark-dependent and -independent sarcoplasmic reticulum Ca<sup>2+</sup> leak in normal and failing rabbit ventricular myocytes. *J Physiol* 2010;**588**:4743-57.

- 13 Thireau J, Karam S, Fauconnier J, et al. Functional evidence for an active role of B-type natriuretic peptide in cardiac remodelling and pro-arrhythmogenicity. *Cardiovasc Res* 2012;**95**:59-68.
- 14 Kass RS, Lederer WJ, Tsien RW, et al. Role of calcium ions in transient inward currents and aftercontractions induced by strophanthidin in cardiac Purkinje fibres. *J Physiol* 1978;**281**:187-208.
- 15 George CH. Sarcoplasmic reticulum Ca<sup>2+</sup> leak in heart failure: mere observation or functional relevance? *Cardiovasc Res* 2008;**77**:302-14.
- 16 Diaz ME, Trafford AW, O'Neill SC, et al. Measurement of sarcoplasmic reticulum Ca<sup>2+</sup> content and sarcolemmal Ca<sup>2+</sup> fluxes in isolated rat ventricular myocytes during spontaneous Ca<sup>2+</sup> release. *J Physiol* 1997;**501 ( Pt 1)**:3-16.
- 17 Bers DM. Cardiac Sarcoplasmic Reticulum Calcium Leak: Basis and Roles in Cardiac Dysfunction. *Annu Rev Physiol* 2013.
- 18 Shannon TR, Ginsburg KS, Bers DM. Potentiation of fractional sarcoplasmic reticulum calcium release by total and free intra-sarcoplasmic reticulum calcium concentration. *Biophys J* 2000;**78**:334-43.
- 19 Bassani JW, Yuan W, Bers DM. Fractional SR Ca release is regulated by trigger Ca and SR Ca content in cardiac myocytes. *Am J Physiol* 1995;**268**:C1313-9.
- 20 Marx SO, Marks AR. Dysfunctional ryanodine receptors in the heart: new insights into complex cardiovascular diseases. *J Mol Cell Cardiol* 2013;**58**:225-31.
- 21 Rousseau E, Smith JS, Henderson JS, et al. Single channel and <sup>45</sup>Ca<sup>2+</sup> flux measurements of the cardiac sarcoplasmic reticulum calcium channel. *Biophys J* 1986;**50**:1009-14.
- 22 Bovo E, Mazurek SR, Blatter LA, et al. Regulation of sarcoplasmic reticulum Ca<sup>2+</sup> leak by cytosolic Ca<sup>2+</sup> in rabbit ventricular myocytes. *J Physiol* 2011;**589**:6039-50.
- 23 Gomez AM, Rueda A, Sainte-Marie Y, et al. Mineralocorticoid modulation of cardiac ryanodine receptor activity is associated with downregulation of FK506-binding proteins. *Circulation* 2009;**119**:2179-87.



- 24 Ikeda Y, Hoshijima M, Chien KR. Toward biologically targeted therapy of calcium cycling defects in heart failure. *Physiology (Bethesda)* 2008;**23**:6-16.
- 25 Song LS, Pi Y, Kim SJ, et al. Paradoxical cellular Ca<sup>2+</sup> signaling in severe but compensated canine left ventricular hypertrophy. *Circ Res* 2005;**97**:457-64.
- 26 Zhang GQ, Wei H, Lu J, et al. Identification and characterization of calcium sparks in cardiomyocytes derived from human induced pluripotent stem cells. *PLoS One* 2013;**8**:e55266.
- 27 Lukyanenko V, Gyorke S. Ca<sup>2+</sup> sparks and Ca<sup>2+</sup> waves in saponin-permeabilized rat ventricular myocytes. *J Physiol* 1999;**521 Pt 3**:575-85.
- 28 Xiao RP, Valdivia HH, Bogdanov K, et al. The immunophilin FK506-binding protein modulates Ca<sup>2+</sup> release channel closure in rat heart. *J Physiol* 1997;**500 ( Pt 2)**:343-54.
- 29 Most P, Plegier ST, Volkens M, et al. Cardiac adenoviral S100A1 gene delivery rescues failing myocardium. *J Clin Invest* 2004;**114**:1550-63.
- 30 Volkens M, Loughrey CM, Macquaide N, et al. S100A1 decreases calcium spark frequency and alters their spatial characteristics in permeabilized adult ventricular cardiomyocytes. *Cell Calcium* 2007;**41**:135-43.
- 31 Ackermann GE, Domenighetti AA, Deten A, et al. S100A1 deficiency results in prolonged ventricular repolarization in response to sympathetic activation. *Gen Physiol Biophys* 2008;**27**:127-42.
- 32 Marks AR. Calcium cycling proteins and heart failure: mechanisms and therapeutics. *J Clin Invest* 2013;**123**:46-52.
- 33 Brinks H, Rohde D, Voelkers M, et al. S100A1 genetically targeted therapy reverses dysfunction of human failing cardiomyocytes. *J Am Coll Cardiol* 2011;**58**:966-73.
- 34 Plegier ST, Most P, Boucher M, et al. Stable myocardial-specific AAV6-S100A1 gene therapy results in chronic functional heart failure rescue. *Circulation* 2007;**115**:2506-15.
- 35 Wickenden AD, Kaprielian R, Kassiri Z, et al. The role of action potential prolongation and altered intracellular calcium handling in the pathogenesis of heart failure. *Cardiovasc Res* 1998;**37**:312-23.

- 36 Aïmond F, Alvarez JL, Rauzier JM, et al. Ionic basis of ventricular arrhythmias in remodeled rat heart during long-term myocardial infarction. *Cardiovasc Res* 1999;**42**:402-15.
- 37 Shi CX, Wang YH, Dong F, et al. [Transmural L-type calcium current in a pressure-overloaded mouse model with heart failure]. *Sheng Li Xue Bao* 2007;**59**:19-26.
- 38 Benitah JP, Alvarez JL, Gomez AM. L-type Ca(2+) current in ventricular cardiomyocytes. *J Mol Cell Cardiol* 2010;**48**:26-36.
- 39 Fauconnier J, Lacampagne A, Rauzier JM, et al. Ca<sup>2+</sup>-dependent reduction of IK1 in rat ventricular cells: a novel paradigm for arrhythmia in heart failure? *Cardiovasc Res* 2005;**68**:204-12.
- 40 Cerbai E, Barbieri M, Li Q, et al. Ionic basis of action potential prolongation of hypertrophied cardiac myocytes isolated from hypertensive rats of different ages. *Cardiovasc Res* 1994;**28**:1180-7.
- 41 Ryder KO, Bryant SM, Hart G. Membrane current changes in left ventricular myocytes isolated from guinea pigs after abdominal aortic coarctation. *Cardiovasc Res* 1993;**27**:1278-87.
- 42 Rozanski GJ, Xu Z, Whitney RT, et al. Electrophysiology of rabbit ventricular myocytes following sustained rapid ventricular pacing. *J Mol Cell Cardiol* 1997;**29**:721-32.
- 43 Beuckelmann DJ, Nabauer M, Erdmann E. Alterations of K<sup>+</sup> currents in isolated human ventricular myocytes from patients with terminal heart failure. *Circ Res* 1993;**73**:379-85.
- 44 Kaab S, Nuss HB, Chiamvimonvat N, et al. Ionic mechanism of action potential prolongation in ventricular myocytes from dogs with pacing-induced heart failure. *Circ Res* 1996;**78**:262-73.
- 45 Wang Y, Cheng J, Chen G, et al. Remodeling of outward K<sup>+</sup> currents in pressure-overload heart failure. *J Cardiovasc Electrophysiol* 2007;**18**:869-75.
- 46 Tsuji Y, Opthof T, Kamiya K, et al. Pacing-induced heart failure causes a reduction of delayed rectifier potassium currents along with decreases in calcium and transient outward currents in rabbit ventricle. *Cardiovasc Res* 2000;**48**:300-9.
- 47 Hirsch JR, Meyer M, Magert HJ, et al. cGMP-dependent and -independent inhibition of a K<sup>+</sup> conductance by natriuretic peptides: molecular and functional studies in human proximal tubule cells. *J Am Soc Nephrol* 1999;**10**:472-80.

- 48 Solomon SD, Zelenkofske S, McMurray JJ, et al. Sudden death in patients with myocardial infarction and left ventricular dysfunction, heart failure, or both. *N Engl J Med* 2005;**352**:2581-8.
- 49 Buxton AE. Sudden death after myocardial infarction--who needs prophylaxis, and when? *N Engl J Med* 2005;**352**:2638-40.
- 50 Fauconnier J, Bedut S, Le Guennec JY, et al. Ca<sup>2+</sup> current-mediated regulation of action potential by pacing rate in rat ventricular myocytes. *Cardiovasc Res* 2003;**57**:670-80.
- 51 Schouten VJ, ter Keurs HE, Quaegebeur JM. Influence of electrogenic Na/Ca exchange on the action potential in human heart muscle. *Cardiovasc Res* 1990;**24**:758-67.
- 52 Sipido KR, Volders PG, de Groot SH, et al. Enhanced Ca<sup>2+</sup> release and Na/Ca exchange activity in hypertrophied canine ventricular myocytes: potential link between contractile adaptation and arrhythmogenesis. *Circulation* 2000;**102**:2137-44.
- 53 Janvier NC, Boyett MR. The role of Na-Ca exchange current in the cardiac action potential. *Cardiovasc Res* 1996;**32**:69-84.
- 54 Xie LH, Weiss JN. Arrhythmogenic consequences of intracellular calcium waves. *Am J Physiol Heart Circ Physiol* 2009;**297**:H997-H1002.
- 55 Shorofsky SR, January CT. L- and T-type Ca<sup>2+</sup> channels in canine cardiac Purkinje cells. Single-channel demonstration of L-type Ca<sup>2+</sup> window current. *Circ Res* 1992;**70**:456-64.
- 56 Zeng J, Rudy Y. Early afterdepolarizations in cardiac myocytes: mechanism and rate dependence. *Biophys J* 1995;**68**:949-64.
- 57 Antoons G, Volders PG, Stankovicova T, et al. Window Ca<sup>2+</sup> current and its modulation by Ca<sup>2+</sup> release in hypertrophied cardiac myocytes from dogs with chronic atrioventricular block. *J Physiol* 2007;**579**:147-60.
- 58 Richard S, Perrier E, Fauconnier J, et al. 'Ca<sup>2+</sup>-induced Ca<sup>2+</sup> entry' or how the L-type Ca<sup>2+</sup> channel remodels its own signalling pathway in cardiac cells. *Prog Biophys Mol Biol* 2006;**90**:118-35.

59 January CT, Moscucci A. Cellular mechanisms of early afterdepolarizations. *Ann N Y Acad Sci* 1992;**644**:23-32.

60 Volders PG, Kulcsar A, Vos MA, et al. Similarities between early and delayed afterdepolarizations induced by isoproterenol in canine ventricular myocytes. *Cardiovasc Res* 1997;**34**:348-59.
