# Supplementary material for: β-Adrenergic blockade combined with subcutaneous B-type natriuretic peptide: a promising approach to reduce ventricular arrhythmia in heart failure?
Source: HighWire-hosted journal article supplement (doi:10.1136/heartjnl-2013-305167), 2014-03-25
Supplement: heartjnl-2013-305167supp_figures.pdf [file heartjnl-2013-305167supp_figures.pdf]

Supplementary Figures

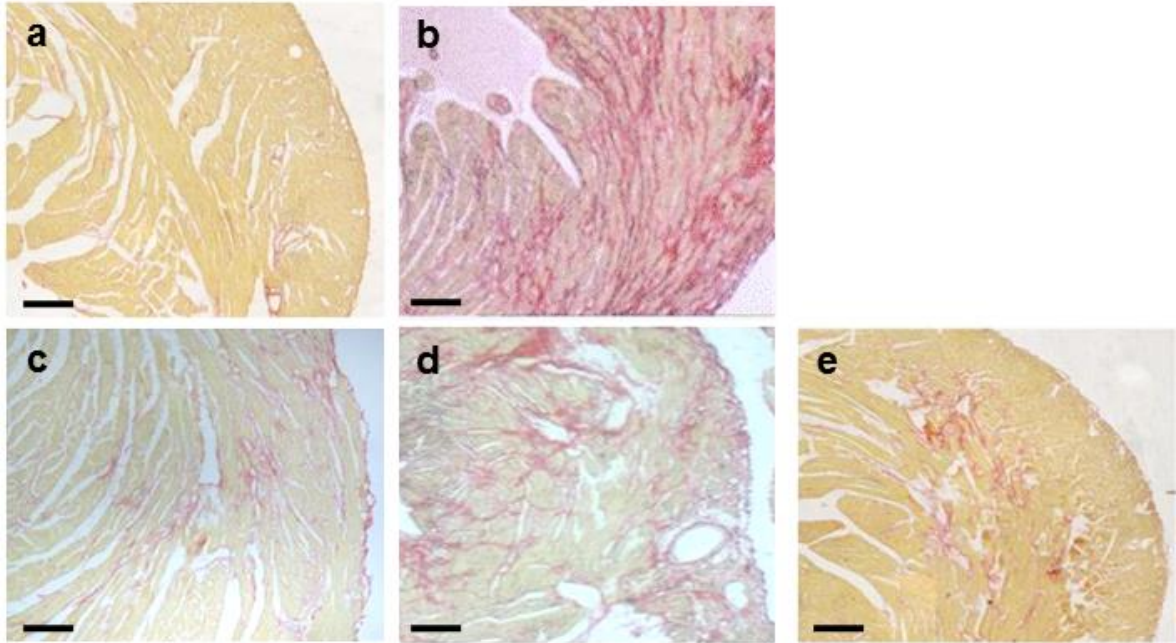

***Supplementary Figure S1.***  
***Thireau et al.***

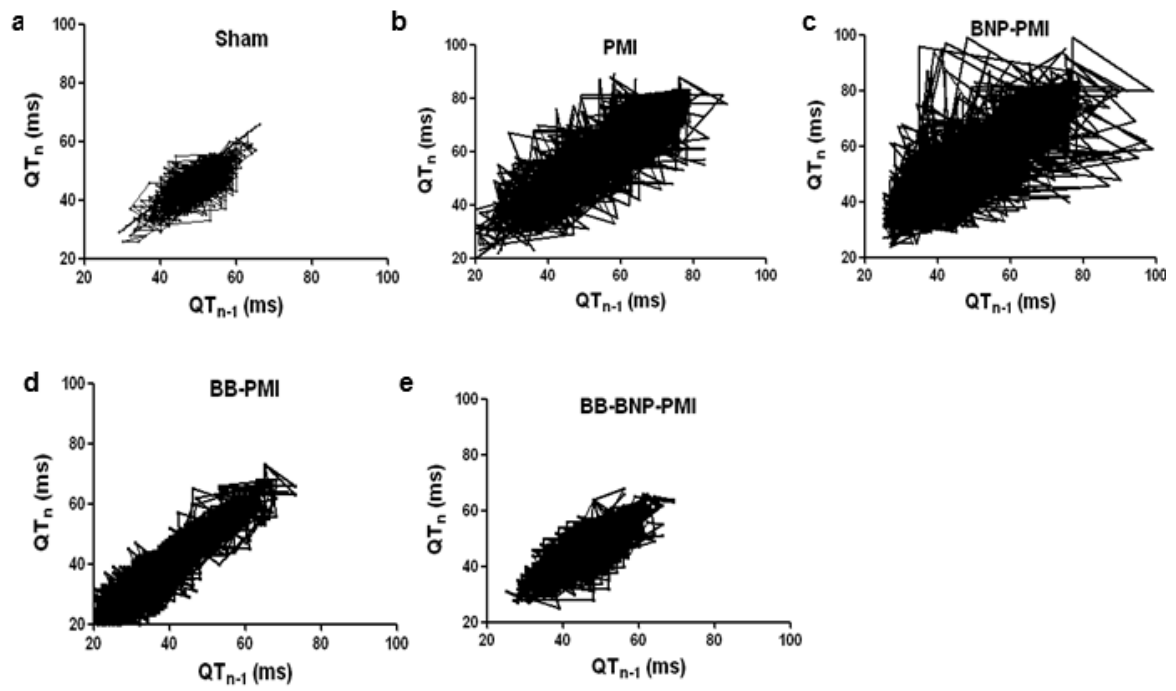

**Supplementary Figure S2.**  
*Thireau et al.*

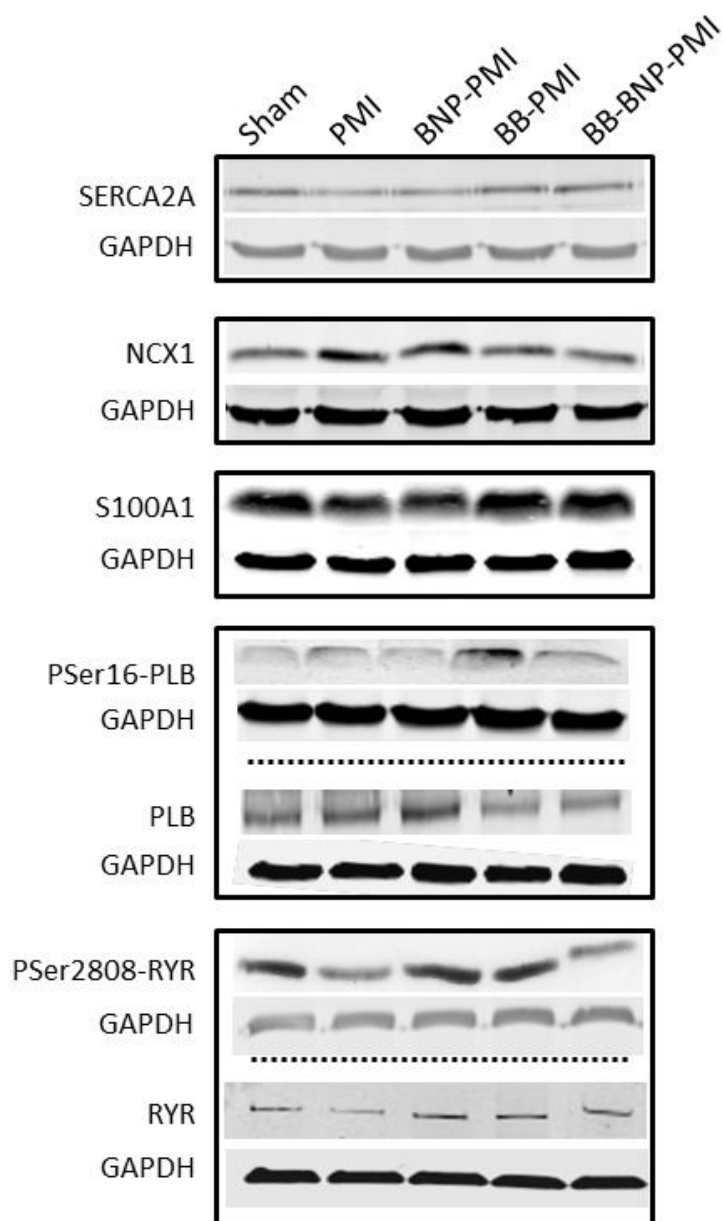

*Supplementary Figure S3.*  
*Thireau et al.*
