# Supplementary material for: β-Adrenergic blockade combined with subcutaneous B-type natriuretic peptide: a promising approach to reduce ventricular arrhythmia in heart failure?
Source: HighWire-hosted journal article supplement (doi:10.1136/heartjnl-2013-305167), 2014-03-25
Supplement: heartjnl-2013-305167supp_tableS1.pdf [file heartjnl-2013-305167supp_tableS1.pdf]

**Supplementary Table 1. Non-invasive blood pressure measurement**

|                                        | <b>Sham</b> | <b>PMI</b>  | <b>BNP-PMI</b> | <b>BB-PMI</b> | <b>BB-BNP-PMI</b> |
|----------------------------------------|-------------|-------------|----------------|---------------|-------------------|
| <i>Blood pressure during treatment</i> |             |             |                |               |                   |
| <b>Systolic</b><br>(mmHg)              | 128.5±5.1   | 103.4±1.9 ‡ | 100.1±1.9 ‡    | 96.3±1.9 ‡    | 98.6±1.8 ‡        |
| <b>Diastolic</b><br>(mmHg)             | 106.9±3.6   | 97.0±1.8 †  | 92.1±1.3 ‡,§   | 88.4±1.8 ‡,§  | 89.5±1.7 ‡,§      |
| <b>Mean</b><br>(mmHg)                  | 116.8±3.6   | 100.2±1.7 † | 94.1±1.4 ‡,§   | 91.4±1.8 ‡,§  | 92.2±1.9 ‡,§      |
| <i>Blood pressure after treatment</i>  |             |             |                |               |                   |
| <b>Systolic</b><br>(mmHg)              | 133.7±1.1   | 101.8±1.8 ‡ | 111.6±2.8 †,§  | 103.2±1.5 ‡   | 119.3±2.7 †,§     |
| <b>Diastolic</b><br>(mmHg)             | 107.9±3.6   | 95.8±3.9 †  | 102.6±3.3 *,§  | 94.2±1.1 †    | 102.5±2.7 *,§     |
| <b>Mean</b><br>(mmHg)                  | 116.4±2.1   | 97.1±2.6 ‡  | 105.6±2.7 *,§  | 97.3±1.1 ‡    | 108.0±1.3 *,§     |
