# Supplementary material for: β-Adrenergic blockade combined with subcutaneous B-type natriuretic peptide: a promising approach to reduce ventricular arrhythmia in heart failure?
Source: HighWire-hosted journal article supplement (doi:10.1136/heartjnl-2013-305167), 2014-03-25
Supplement: heartjnl-2013-305167supp_tableS2.pdf [file heartjnl-2013-305167supp_tableS2.pdf]

**Supplementary Table. S2. mRNA expression of hypertrophic markers and Ca<sup>2+</sup> handling proteins.**

|                | <b>Sham</b> | <b>PMI</b>  | <b>BNP-PMI</b> | <b>BB-PMI</b> | <b>BB-BNP-PMI</b> |
|----------------|-------------|-------------|----------------|---------------|-------------------|
| <b>MRTF-A</b>  | 1.48±0.19   | 3.16±0.14 † | 2.58±0.21 *,§  | 2.36±0.12 *,§ | 1.42±0.09   ,#    |
| <b>SRF</b>     | 1.77±0.09   | 2.62±0.27 * | 2.41±0.34 *    | 1.99±0.14 §   | 1.55±0.16   ,#    |
| <b>SERCA2A</b> | 1.49±0.16   | 0.84±0.17 * | 0.34±0.20 †,§  | 1.91±0.14 †,§ | 2.66±0.16 ‡,  ,#  |
| <b>NCX1</b>    | 0.82±0.26   | 1.98±0.24 † | 2.3±0.34 †     | 1.51±0.14 *   | 0.64±0.26   ,#    |
| <b>S100A1</b>  | 5.96±0.26   | 3.08±0.24 † | 1.67±0.34 ‡,§  | 4.21±0.14 †   | 5.33±0.26 §,#     |
