# Supplementary material for: β-Adrenergic blockade combined with subcutaneous B-type natriuretic peptide: a promising approach to reduce ventricular arrhythmia in heart failure?
Source: HighWire-hosted journal article supplement (doi:10.1136/heartjnl-2013-305167), 2014-03-25
Supplement: heartjnl-2013-305167supp_tableS3.pdf [file heartjnl-2013-305167supp_tableS3.pdf]

**Supplementary Table S3: Action potential and ionic currents characteristics.**

|                                           | <b>Sham</b>                     | <b>PMI</b>                           | <b>PMI-BNP</b>                        |
|-------------------------------------------|---------------------------------|--------------------------------------|---------------------------------------|
| <b>Action potential</b>                   |                                 |                                      |                                       |
| Arrhythmia (EAD)                          | 0 event                         | 2 /20 cells                          | 6 /11 cells                           |
| RMP (mV)<br>n=                            | -90.0 ± 1.5<br>11               | -79.9 ± 1.3 *<br>20                  | -72.4 ± 0.8 *;£<br>11                 |
| Amplitude (mV)<br>n=                      | 127.0 ± 4.7<br>11               | 123.0 ± 2.5<br>20                    | 119.2 ± 2.8<br>11                     |
| APD20 (ms)<br>V <sub>m</sub> (mV)<br>n=   | 1.1 ± 0.1<br>11.4 ± 3.6<br>11   | 3.4 ± 0.6 *<br>18.5 ± 2.4<br>20      | 2.1 ± 0.3 *<br>23.0 ± 1.8 *<br>11     |
| APD50 (ms)<br>V <sub>m</sub> (mV)<br>n=   | 4.3 ± 1.0<br>-26.4 ± 2.3<br>11  | 18.7 ± 3.2 *<br>-18.5 ± 1.8 *<br>20  | 11.8 ± 2.6 *<br>-12.6 ± 1.1 *;£<br>11 |
| APD90 (ms)<br>V <sub>m</sub> (mV)<br>n=   | 29.5 ± 4.0<br>-77.4 ± 1.4<br>11 | 99.1 ± 13.3 *<br>-68.3 ± 1.3 *<br>20 | 96.1 ± 22.7 *<br>-61.1 ± 0.9 *;£<br>7 |
|                                           |                                 |                                      |                                       |
| <b>Ionic currents</b>                     |                                 |                                      |                                       |
| I <sub>K,peak</sub> density (pA/pF)<br>n= | 68 ± 8.1<br>13                  | 30.5 ± 3.7 *<br>22                   | 30.2 ± 6.5 *<br>13                    |
| I <sub>to,f</sub> density (pA/pF)<br>n=   | 28.6 ± 3.3<br>13                | 15.6 ± 2.6 *<br>22                   | 16.0 ± 5.0 *<br>13                    |
| I <sub>to,f</sub> inac (ms)<br>n=         | 116.0 ± 8.0<br>13               | 94.0 ± 10.0<br>22                    | 108.0 ± 10.0<br>13                    |
| I <sub>K,slow</sub> density (pA/pF)<br>n= | 25.0 ± 3.6<br>13                | 9.1 ± 0.8 *<br>22                    | 8.7 ± 0.9 *<br>13                     |
| I <sub>K,slow</sub> inac (ms)<br>n=       | 1214 ± 105<br>13                | 1300 ± 82<br>22                      | 1268 ± 120<br>13                      |
| I <sub>SS</sub> density (pA/pF)<br>n=     | 5.6 ± 0.6<br>13                 | 4.7 ± 0.3<br>22                      | 4.0 ± 0.4<br>13                       |
| I <sub>K1</sub> density (pA/pF)<br>n=     | -3.0 ± 0.2<br>17                | -3.0 ± 0.3<br>22                     | -3.6 ± 0.5<br>13                      |
|                                           |                                 |                                      |                                       |
| I <sub>Ca,L</sub> density (pA/pF)<br>n=   | -10.9 ± 0.7<br>20               | -7.5 ± 0.6 *<br>15                   | -7.6 ± 0.6 *<br>16                    |
| Fast I <sub>Ca,L</sub> inac (ms)<br>n=    | 4.6 ± 0.2<br>20                 | 6.4 ± 0.5 *<br>15                    | 5.2 ± 0.3 *<br>16                     |
| Slow I <sub>Ca,L</sub> inac (ms)<br>n=    | 86.5.0 ± 5.2<br>20              | 99.8 ± 8.9 *<br>15                   | 101.6 ± 4.5 *<br>16                   |
| I <sub>Ca,L</sub> st st inac (mV)<br>n=   | -30.0 ± 0.4<br>20               | -26.4 ± 0.6 *<br>15                  | -24.4 ± 0.5 *<br>14                   |
