# Supplementary material for: β-Adrenergic blockade combined with subcutaneous B-type natriuretic peptide: a promising approach to reduce ventricular arrhythmia in heart failure?
Source: HighWire-hosted journal article supplement (doi:10.1136/heartjnl-2013-305167), 2014-03-25
Supplement: heartjnl-2013-305167supp_tableS4.pdf [file heartjnl-2013-305167supp_tableS4.pdf]

**Supplementary Table S4: Survival during experimental protocol.**

|            | Treatment Period | Arrhythmogenic test 1<br>(under treatment) | Arrhythmogenic test 2<br>(treatment stopped) | End of Protocol<br>(5 weeks after arrhythmogenic test 2) |
|------------|------------------|--------------------------------------------|----------------------------------------------|----------------------------------------------------------|
| Sham       | 12               | 12                                         | 12                                           | 11(α)                                                    |
| PMI        | 12               | 12                                         | 12                                           | 7*                                                       |
| BNP-PMI    | 12               | 12                                         | 8                                            | 5†                                                       |
| BB-PMI     | 12               | 12                                         | 12                                           | 8*                                                       |
| BB-BNP-PMI | 12               | 12                                         | 12                                           | 11‡§                                                     |
